1 **Heart rate responses to temperature in free-swimming Pacific bluefin tuna (*Thunnus orientalis*)**

2

3 T.D. Clark<sup>1,2</sup>, C.J. Farwell, L.E. Rodriguez<sup>1</sup>, W.T. Brandt<sup>1</sup>, B.A. Block<sup>1</sup>

4

5 <sup>1</sup> Tuna Research and Conservation Center, Stanford University, Hopkins Marine Station/Monterey Bay  
6 Aquarium, Pacific Grove, CA 93950, USA.

7 <sup>2</sup> Australian Institute of Marine Science, PMB 3, Townsville MC, Queensland 4810, Australia.

8

9 *Running head:* Heart rate response to temperature in bluefin

10

11

12

13

14

15

16

17

18

19

20

21

22

23

24

## SUMMARY

The bluefin tuna heart remains at ambient water temperature ( $T_a$ ) but must supply blood to warm regions of the body served by countercurrent vascular heat exchangers. Despite this unusual physiology, inherent difficulties have precluded an understanding of the cardiovascular responses to  $T_a$  in free-swimming bluefin tunas. We measured the heart rate ( $f_H$ ) responses of two captive Pacific bluefin tunas (*Thunnus orientalis*; 9.7 and 13.3 kg) over a cumulative period of 40 d. Routine  $f_H$  during fasting in the holding tank at a  $T_a$  of 20°C was  $45.1 \pm 8.0$  and  $40.7 \pm 6.5$  beats  $\text{min}^{-1}$  for Tuna 1 and Tuna 2, respectively.  $f_H$  decreased in each fish with  $Q_{10}$  of 2.6 (Tuna 1) and 3.1 (Tuna 2) as  $T_a$  in the tank was slowly decreased to 15°C ( $\sim 0.4^\circ\text{C h}^{-1}$ ), despite a gradual increase in swimming speed. The same thermal challenge during digestion revealed similar thermal dependence of  $f_H$  and indicated that the rate of visceral cooling is not buffered by the heat increment of feeding. Acutely decreasing  $T_a$  from 20 to 10°C while Tuna 1 swam in a tunnel respirometer caused a progressive increase in tail beat-frequency and oxygen consumption rate ( $\dot{M}_{O_2}$ ).  $f_H$  of this fish decreased with  $Q_{10}$  of 2.7 as  $T_a$  decreased between 20 and 15°C, while further cooling to 10°C saw a general plateau in  $f_H$  around 35 beats  $\text{min}^{-1}$  with  $Q_{10}$  of 1.3. A discussion of the relationships between  $f_H$ ,  $\dot{M}_{O_2}$ , and haemoglobin-oxygen binding sheds further light on how bluefin cardiorespiratory systems function in a changing thermal environment.

Key words: Ambient temperature, visceral temperature, cardiorespiratory, cardiovascular, oxygen consumption rate, tail beat-frequency, swimming speed, thermal biology.

## INTRODUCTION

Bluefin tunas (*Thunnus orientalis*, *T. thynnus* and *T. maccoyii*) are large, powerful predators that possess a suite of exceptional specialisations to enable a high-performance lifestyle throughout the oceans of the world (Block and Finnerty, 1994; Graham and Dickson, 2004; Block et al., 2005;

49 Patterson et al., 2008; Boustany et al., 2010). Bluefin are renowned for their capacity to use entire  
50 ocean basins for a home range, encountering broad thermal gradients both in their latitudinal  
51 migrations and during vertical diving (Block et al., 2001; Marcinek et al., 2001; Lawson et al., 2010).  
52 The acute thermal changes experienced by bluefin tunas would be lethal to many fishes, raising  
53 interesting questions about how these tunas are physiologically specialised to cope. Bluefin tunas  
54 benefit from the presence of extensive countercurrent vascular heat exchangers (*retia mirabilia*) that  
55 allow metabolic heat conservation in specific regions of the body to buffer from ambient temperature  
56 fluctuations (termed ‘regional heterothermy’ or ‘regional endothermy’). Heat exchangers in bluefin  
57 tunas are associated with the circulation to the eyes, brain, viscera and slow-oxidative muscles (Carey  
58 and Teal, 1969; Carey et al., 1984; Fudge and Stevens, 1996; Dickson and Graham, 2004), and  
59 subsequently they are hypothesised to enhance visual acuity, neural processing, digestion, and skeletal  
60 muscle contraction frequencies during periods in cooler waters (Carey et al., 1984; Altringham and  
61 Block, 1997; Dickson and Graham, 2004).

62         Although much of the bluefin tuna’s body is maintained at warmer temperatures than the  
63 ambient water, the heart is not served by heat exchangers, it is positioned close to the gills, and it  
64 receives a large coronary blood supply, thus ensuring that the heart remains very close to ambient  
65 temperature at all times (Fudge and Stevens, 1996; Brill and Bushnell, 2001). Consequently, a  
66 physiological situation exists in bluefin tunas where a heart at ambient temperature must maintain  
67 blood and oxygen supply to warm tissues. The differential between ambient and body core  
68 temperatures is particularly pronounced during foraging dives below the thermocline (Block et al.,  
69 2001; Walli et al., 2009; Lawson et al., 2010). Furthermore, the temperature differential between the  
70 heart and the visceral organs is greatest during digestion when the visceral cavity undergoes a thermal  
71 increment that is dependent on meal mass (termed ‘heat increment of feeding (HIF)’, or ‘specific

72 dynamic action (SDA)'; Carey et al., 1984; Gunn et al., 2001; Walli, 2007; Clark et al., 2008b; Clark et  
73 al., 2010).

74 Despite the exceptional conditions under which the tuna heart must function, little is known of  
75 the *in vivo* cardiovascular responses of tunas to changes in water temperature due to the inherent  
76 difficulties of studying free-swimming tunas. Current knowledge is limited to *in situ* and *in vitro* heart  
77 preparations, or tethered or immobilised tunas shortly after handling and instrumentation (Dizon et al.,  
78 1974; Bushnell and Brill, 1992; Korsmeyer et al., 1997a; Blank et al., 2002; Blank et al., 2004). A  
79 temperature-mediated decrease in  $f_H$  scope has been proposed to limit the vertical distribution of  
80 yellowfin, skipjack and juvenile bigeye tunas to temperatures above 15°C (Holland et al., 1990; Brill et  
81 al., 1999; Brill and Bushnell, 2001), although large yellowfin can occasionally withstand much cooler  
82 temperatures for short periods (Dagorn et al., 2006; Schaefer et al., 2011). In contrast, other research  
83 indicates that the cardiac function of Pacific bluefin tunas is more tolerant of cold temperatures such  
84 that they can routinely dive into waters less than 10°C and maintain a consistent presence in the mixed  
85 layer of the cool but productive California Current waters (14-21°C) (Block et al., 2001; Blank et al.,  
86 2004; Kitagawa et al., 2007; Galli et al., 2009; Boustany et al., 2010; Galli et al., 2011).

87 Swimming speed is temperature-dependent in some tuna species (Dizon et al., 1977; Malte et  
88 al., 2007), and juvenile Pacific bluefin tunas increase tail beat-frequency and oxygen consumption rate  
89 ( $\dot{M}_{O_2}$ ) with decreasing water temperature while swimming in a tunnel respirometer (Blank et al.,  
90 2007). This increase in  $\dot{M}_{O_2}$  with decreasing water temperature is unusual for a fish, and thus the  
91 question arises as to how bluefin tunas are able to increase circulatory oxygen transport in the face of  
92 decreasing water temperature. Moreover, in the absence of direct measurements of cardiovascular data  
93 from free-swimming and untethered individuals at different temperatures, it remains unclear how  
94 thermally-driven changes in swimming activity might interact with cardiovascular function.

95 In light of these knowledge gaps, the present study used innovative archival tag technology to  
96 provide the first insight into the cardiovascular responses of free-swimming, untethered and well-  
97 recovered Pacific bluefin tunas faced with acute changes in water temperature. Due to the inherent  
98 difficulties of performing such measurements on large fish, this study includes data from only two  
99 individuals. We aimed to identify how  $f_H$  is regulated in response to acute changes in water temperature  
100 in free-swimming tunas, and investigate the cardiovascular responses underlying the increase in  $\dot{M}_{O_2}$   
101 with decreasing temperature.

## 103 MATERIALS AND METHODS

104 A full description of the materials and methods is given in *Supplemental material*. Briefly, two juvenile  
105 Pacific bluefin tunas (*Thunnus orientalis*) were caught off the coast of Mexico from the fishing vessel  
106 *Shogun*. Fish were transported to the Tuna Research and Conservation Center of Stanford University,  
107 CA, USA, where they were held at 20°C until archival tags measuring ECG and temperature were  
108 surgically implanted into the visceral cavity ~35 d prior to experiments. Body mass ( $M_b$ ) and straight  
109 fork length (FL) for Tuna 1 and Tuna 2 at the time of experiments were 9.7 kg and 77 cm, and 13.3 kg  
110 and 80 cm, respectively.

111 Temperature change experiments were conducted in the holding tank with an aim to quantify  
112 the swimming behaviour (swimming speed and tail beat-frequency) and heart rate ( $f_H$ ) of fasted fish as  
113 they experienced firstly a rapid ( $\sim 3^\circ\text{C h}^{-1}$  down to 14.5°C) and then a slower ( $\sim 0.3^\circ\text{C h}^{-1}$  down to 15°C)  
114 change in water temperature (Fig. 1). The rapid temperature change was repeated when fish were  
115 digesting a satiation meal to determine whether HIF buffered changes in visceral temperature. Towards  
116 the end of the experimental period, Tuna 2 was transferred from the holding tank at 20°C to an adjacent  
117 holding tank at 23.5°C for 2 d prior to the completion of the study.

118 Tuna 1 was used to examine oxygen consumption rates ( $\dot{M}_{O_2}$ ) simultaneously with  
119 measurements from the archival tag during temperature challenges. The fish swam in a tunnel  
120 respirometer for 32 h to reach an acclimated state prior to the temperature challenges. The first  
121 temperature challenge was a stepwise decrease in water temperature ( $\sim 2^\circ\text{C}$  every 2 h) to  $\sim 14^\circ\text{C}$   
122 followed by a return to  $20^\circ\text{C}$ , while the second challenge was a more rapid decrease to  $\sim 10^\circ\text{C}$  for 2 h  
123 and a subsequent return to  $20^\circ\text{C}$ . The fish remained in the respirometer for 60 h in total and water speed  
124 was maintained at  $1 \text{ FL s}^{-1}$ .

125 ECG data from the archival tags were imported into LabChart software (ADInstruments,  
126 Sydney, Australia) and  $f_H$  was calculated as an average for each 10-s period (data shown in Fig. 1).  
127 Routine  $f_H$  from the holding tank at a  $T_a$  of  $20 \pm 0.3^\circ\text{C}$  was calculated after excluding data associated  
128 with feeding/digesting events and data from different ambient temperatures (leaving  $\sim 63$  h of data per  
129 tuna). Maximal  $f_H$  for each tuna was calculated as the highest  $f_H$  achieved in any 10-s period after  
130 confirming values by manually viewing the raw ECG traces. Furthermore, histograms were formulated  
131 for the  $f_H$  and  $T_V$  data to examine frequency distributions in bins of  $10 \text{ beats min}^{-1}$  and  $1^\circ\text{C}$ ,  
132 respectively. Oxygen pulse for the fish in the respirometer was calculated as  $\dot{M}_{O_2}/f_H$ , and represents the  
133 amount of oxygen extracted by the tissues per heart beat (i.e., cardiac stroke volume ( $V_S$ ) x tissue  
134 oxygen extraction, where the latter is related to the difference in oxygen content of arterial ( $CaO_2$ ) and  
135 venous ( $CvO_2$ ) blood). Further data analysis techniques are outlined in *Supplementary material*.

## 137 RESULTS

### 138 Routine measurements at constant water temperature

139 Tunas in the holding tank were generally fed three times per week on alternate days, and once the SDA  
140 events were completed the fish were considered to be in a fasted, 'resting' state. These fasted bluefin  
141 tunas at a  $T_a$  of  $20 \pm 0.3^\circ\text{C}$  maintained a thermal excess, where Tuna 1 (9.7 kg) had an average ( $\pm$ SD)  $T_V$

142 of  $22.6 \pm 0.6^\circ\text{C}$  with the most (66.1%) records occurring between 22 and  $23^\circ\text{C}$ , while the larger Tuna 2  
143 (13.3 kg) had an average  $T_V$  of  $23.3 \pm 0.4^\circ\text{C}$  with the most (52.0%) records occurring between 23 and  
144  $24^\circ\text{C}$  (Fig. 1). During the same periods (~63 h per tuna), routine  $f_H$  of Tuna 1 averaged  $45.1 \pm 8.0$  beats  
145  $\text{min}^{-1}$  with the most (48.3%) records occurring between 40 and  $50 \text{ beats min}^{-1}$ , while routine  $f_H$  of Tuna  
146 2 averaged  $40.7 \pm 6.5 \text{ beats min}^{-1}$  with the most (44.5%) records occurring between 30 and  $40 \text{ beats min}^{-1}$   
147 (Fig. 1). The tunas were fed once in the holding tank during the course of these records at a  $T_a$  of  
148  $20^\circ\text{C}$ , with the feeding and digestion event associated with elevated  $f_H$  up to  $75\text{-}90 \text{ beats min}^{-1}$  (Fig. 1).

### 149 150 **Thermal challenges in holding tank**

151 A slow drop in  $T_a$  in the holding tank from  $20$  to  $15^\circ\text{C}$  was mirrored by similar absolute decreases in  $T_V$   
152 of the fasted fish (Fig. S1A). Heart rate decreased with  $T_a$ , although an increase in swimming speed at  
153 the coolest temperatures appeared to reduce the influence of  $T_a$  on  $f_H$  (Fig. S1). The increase in  
154 swimming speed was likely a consequence of elevated tail beat amplitude, since there was no  
155 detectable systematic change in tail beat-frequency with temperature (Fig. S1). Using only the data  
156 during the decrease in  $T_a$ ,  $Q_{10}$  for  $f_H$  was 2.6 for Tuna 1 and 3.1 for Tuna 2 between  $20$  and  $15^\circ\text{C}$ .

157 To investigate the simultaneous impact of digestion and temperature on  $f_H$ , fish were given a  
158 thermal challenge 12 h after feeding. The feeding event was associated with abrupt increases in  
159 swimming activity and  $f_H$ . Heart rate remained elevated and  $T_V$  increased progressively following the  
160 feeding event at  $20^\circ\text{C}$ , with  $f_H$  reaching a maximum of  $90 \text{ beats min}^{-1}$  for Tuna 1 and  $75 \text{ beats min}^{-1}$  for  
161 Tuna 2 (Fig. 1). Both  $f_H$  and  $T_V$  were higher in digesting fish than in fasted fish at the commencement  
162 of the rapid temperature challenge (Fig. S2). A rapid decrease in tank  $T_a$  from  $20^\circ\text{C}$  to  $14.5^\circ\text{C}$  caused a  
163 predictable decrease in  $T_V$  regardless of whether the fish were in fasted or digesting states (Fig. S2).  
164 Rates of  $T_V$  change (up to  $0.4^\circ\text{C min}^{-1}$  for Tuna 1, up to  $0.3^\circ\text{C min}^{-1}$  for Tuna 2) were not different  
165 between fasted and digesting states (Figs. S2A, S2D), indicating that the HIF associated with digestion

166 did not afford any buffer against heat loss rates in the holding tank. Nevertheless, digesting fish  
167 maintained a higher  $T_V$  at all times due to the higher thermal excess ( $T_x$ ) afforded by the HIF (Fig. S2).  
168 The decrease in  $T_a$  caused a parallel drop in  $f_H$  from 70-80 beats  $\text{min}^{-1}$  down to 40-55 beats  $\text{min}^{-1}$  in  
169 digesting fish. The response in  $f_H$  to the decrease in  $T_a$  was not as obvious in fasted fish, with  $f_H$  starting  
170 at around 50-60 beats  $\text{min}^{-1}$  at 20°C and falling to 30-40 beats  $\text{min}^{-1}$  at 14.5°C (Fig. S2). Upon  
171 rewarming to a  $T_a$  of 20°C,  $f_H$  and  $T_V$  of Tuna 1 in a digesting state remained elevated for ~9 h in  
172 comparison with the same fish in a fasted state, while Tuna 2 seemed to have almost completed the  
173 digestive process by the time  $T_a$  returned to 20°C (Fig. S2).

### 174 175 **Thermal challenges in respirometer**

176 Tuna 1 was used to provide insight into the cardiac responses associated with thermally-dependent  
177 changes in  $\dot{M}O_2$ . Heart rate of Tuna 1 in the respirometer after 32 h of acclimation at a  $T_a$  of 20°C was  
178 about 60 beats  $\text{min}^{-1}$  (Fig. 2). Decreases in  $T_a$  in the respirometer caused similar qualitative responses  
179 to those seen in the fish in the holding tank. Heart rate decreased with  $T_a$  down to about 14°C, below  
180 which  $f_H$  tended to plateau around 35 beats  $\text{min}^{-1}$  while TBF continued to increase despite maintenance  
181 of the same water velocity through the respirometer (Fig. 2). Consequently,  $Q_{10}$  for  $f_H$  was 2.7 between  
182 15-20°C and only 1.3 between 10-15°C. The increase in TBF did not translate to enhanced visceral heat  
183 retention, as  $T_x$  remained similar at all ambient temperatures from 10-20°C (Fig. 2A, 2H). Importantly,  
184 there was a clear increase in  $\dot{M}O_2$  with decreasing  $T_a$ , which resulted from a linear increase in the  
185 oxygen pulse while  $f_H$  remained essentially constant below 14°C. Regressions in Fig. 2 (equations in  
186 caption) suggest that  $f_H$  and oxygen pulse are more strongly correlated with  $T_a$  ( $r^2=0.86$  and  $r^2=0.84$ ,  
187 respectively) than  $T_V$  ( $r^2=0.71$  and  $r^2=0.56$ , respectively), while  $\dot{M}O_2$  and TBF are similarly correlated  
188 with  $T_a$  ( $r^2=0.60$  and  $r^2=0.59$ , respectively) and  $T_V$  ( $r^2=0.62$  and  $r^2=0.62$ , respectively).



189

190

## DISCUSSION

191

192

193

194

195

196

197

198

199

200

201

202

203

204

205

206

207

208

209

210

211

212

The ability to maintain captive Pacific bluefin tunas provided the opportunity to explore thermal effects on cardiorespiratory parameters in routinely swimming fish equipped with surgically implanted archival tags. We observed that two Pacific bluefin tunas at a holding temperature of 20°C generally maintained a routine  $f_H$  of 40-45 beats  $\text{min}^{-1}$  (typical range 25-50 beats  $\text{min}^{-1}$ ) during non-feeding and non-digesting periods (Fig. 1; squares and triangles in Fig. 2), which is within the range of routine  $f_H$  reported for southern bluefin tuna held in a sea pen at 18-19°C (Clark et al., 2008b). These heart rates are similar if not lower than those reported for *in situ* heart preparations of Pacific bluefin (Blank et al., 2004). Although the instrumented Pacific bluefin in the present study are few in number, the data from the archival tags presented here are from a cumulative period of 40 d. The research on free-swimming, ECG-instrumented Pacific and southern bluefin tunas indicates that these species possess routine  $f_H$  that is not markedly higher than other active teleosts (Brill and Bushnell, 1991; Korsmeyer et al., 1997a; Korsmeyer et al., 1997b; Brill and Bushnell, 2001; Clark and Seymour, 2006; Clark et al., 2008b).

Maximal  $f_H$  observed in the present study was 90 beats  $\text{min}^{-1}$  for Tuna 1 and 75 beats  $\text{min}^{-1}$  for Tuna 2. To date, maximum  $f_H$  has not exceeded 120-130 beats  $\text{min}^{-1}$  in a total of 256 d of records from southern bluefin and Pacific bluefin tunas in large pens or tanks at 18-20°C measured with similar tags. These studies have not specifically tested maximum metabolic rate or  $f_H$ , nor have they exposed tunas to the highest  $T_a$  observed in archival tag records (>30°C; Walli et al., 2009), but in both locations the tunas were periodically excited by feeding, capture and handling throughout the experimental period that presumably elicited at least near-maximal  $f_H$  at the given holding temperatures (present study; Clark et al., 2008b). The maximum  $f_H$  values obtained in the present study are not exceptional for fishes in general and are comparable to those obtained from *in situ* preparations of Pacific bluefin tuna hearts (Blank et al., 2004).

213 The  $Q_{10}$  for  $f_H$  ranged from 2.6 to 3.1 for the two tunas between 15 and 20°C in the holding tank  
214 but dropped to 1.3 when Tuna 1 was further cooled from 15 to 10°C in the respirometer. A previous  
215 study on free-swimming but tethered yellowfin tuna reported  $Q_{10}$  values for  $f_H$  of 2.2-2.4 across a  $T_a$   
216 range of 18-28°C (Korsmeyer et al., 1997a). Heart rates of yellowfin in that study ranged from 40 to  
217 190 beats  $\text{min}^{-1}$  across the temperature range, which are higher than for Pacific bluefin in the present  
218 study but consistent once differences in  $T_a$  are considered. The study of yellowfin did not document  
219 any obvious plateau in  $f_H$  at cool temperatures like that reported here for Pacific bluefin, although this  
220 may not be surprising given the decrease in swimming speed with decreasing  $T_a$  that has been reported  
221 for yellowfin (Dizon et al., 1977) in contrast with the findings presented here. These results highlight  
222 the complexity of performance in tunas where differing capabilities for regional endothermy exist and  
223 differences in temperature-related influences on muscle function indicate variation across tuna species.  
224 Notably, it has been documented that the *in vitro* metabolism of slow- and fast-twitch muscle from  
225 skipjack and bigeye tunas is independent of temperature between 5 and 35°C (Gordon, 1968), yet slow-  
226 twitch muscle power output is highly temperature-dependent in yellowfin and thus force and frequency  
227 benefit from countercurrent heat exchangers (Altringham and Block, 1997). Cardiac studies indicate  
228 that Pacific bluefin tunas outperform yellowfin tunas at cooler temperatures due to their capacity to  
229 maintain heart function, which at the cellular level has been linked to enrichment of sarcoplasmic  
230 reticulum calcium stores, enhanced calcium ATPase activity, and a short action potential duration  
231 (Galli et al., 2009; Galli et al., 2011; Landeira-Fernandez et al., 2012).

232 A notable observation from the present study is the elevated  $f_H$  of Tuna 1 in the respirometer at  
233 20°C in comparison with the same individual while swimming in the holding tank, despite the fact that  
234 the fish was given 32 h to adjust to the respirometer before the experiments commenced (Fig. 2D). We  
235 attribute this difference to slight adjustments in swimming gait, where the fish in the respirometer  
236 maintained a rhythmic tail beat pattern at all times while the fish in the holding tank interspersed

237 rhythmic tail beats with short periods of ‘coasting’ or ‘gliding’. Although the slight adjustments in  
238 swimming gait were not detected through changes in TBF by the methods used here (Fig. 2H), there is  
239 a need for future research to examine the interaction between  $T_a$ , swimming gait, TBF,  $\dot{M}_{O_2}$  and  
240 cardiovascular parameters in bluefin tunas. Such experiments could be achieved with the use of  
241 accelerometry tags in combination with the ECG tags and experimental protocols used here.  
242 Importantly, testing bluefin tunas at the extreme limits of their thermal tolerance will reveal the  
243 resilience and limitations of the cardiovascular system.

244         Recently, temperature independent Hb-O<sub>2</sub> binding was reported in the blood of southern bluefin  
245 tuna between 23 and 36°C, while a reverse temperature effect (left shift in Hb-O<sub>2</sub> dissociation curve  
246 with increasing temperature) was reported between 10 and 23°C (Clark et al., 2008a). As the first to  
247 simultaneously measure  $f_H$  and  $\dot{M}_{O_2}$  of any bluefin tuna species, the present study helps to shed further  
248 light on the unusual oxygen transport mechanisms of these fish. We propose that the unusual Hb-O<sub>2</sub>  
249 binding characteristics in bluefin tunas may play some role in enhancing oxygen unloading at the  
250 muscles at cool water temperatures such that  $C_vO_2$  decreases ( $C_aO_2 - C_vO_2$  increases) and permits the  
251 observed increase in  $\dot{M}_{O_2}$  with TBF and swimming speed. Moreover, by comparing the  $f_H$  of  
252 spontaneously beating hearts in an *in situ* preparation with the findings presented here (Fig. 2D), we  
253 suggest that a greater proportion of  $f_H$  scope is utilised at cold temperature in free-swimming bluefin  
254 (perhaps promoted by a release in cholinergic tone (Keen et al., 1995), and faster swimming and/or  
255 increased TBF) such that the influence of temperature on  $f_H$  is functionally minimised. Since bluefin  
256 myoglobin has a higher affinity for oxygen than does haemoglobin (Rossi-Fanelli et al., 1960), this  
257 could potentially play a role in facilitating diffusion to tissues as the bluefins reach their thermal limits  
258 for cardiovascular oxygen delivery.

259

## ACKNOWLEDGEMENTS

The authors thank the owners, captains and crew of the *F/V Shogun*, particularly Captains Norm Kagawa and Bruce Smith for helping with wild tuna collection, and Mr Ted Dunn for his support of the TRCC program. We thank Dr Oscar Sosa-Nishizaki of CICESE for assisting with tuna research in Mexican waters, and the Mexican government for permitting access to bluefin tunas in their waters. Special thanks to Mr Alex Norton of the Monterey Bay Aquarium for assistance with maintaining the tunas in captivity and for help with conducting experimental protocols, the Husbandry Department of the Monterey Bay Aquarium for assisting with facility care in the TRCC.

## FUNDING

The research was funded by a National Oceanic and Atmospheric Administration (NOAA) aquaculture grant and the Monterey Bay Aquarium Foundation. Partial support for TDC was through a Killam Postdoctoral Fellowship through the University of British Columbia, Canada.

## REFERENCES

**Altringham, J. D. and Block, B. A.** (1997). Why do tuna maintain elevated slow muscle temperatures - power output of muscle isolated from endothermic and ectothermic fish. *J. Exp. Biol.* **200**, 2617-2627.

260  
261  
262  
263  
264  
265  
266  
267  
268  
269  
270  
271  
272  
273  
274  
275  
276  
277  
278  
279  
280  
281  
282  
283  
284

The Journal of Experimental Biology – ACCEPTED AUTHOR MANUSCRIPT

- 285 **Blank, J. M., Morrissette, J. M., Davie, P. S. and Block, B. A.** (2002). Effects of temperature,  
286 epinephrine and Ca<sup>2+</sup> on the hearts of yellowfin tuna (*Thunnus albacares*). *J. Exp. Biol.* **205**,  
287 1881-1888.
- 288 **Blank, J. M., Morrissette, J. M., Farwell, C. J., Price, M., Schallert, R. J. and Block, B. A.** (2007).  
289 Temperature effects on metabolic rate of juvenile Pacific bluefin tuna *Thunnus orientalis*. *J.*  
290 *Exp. Biol.* **210**, 4254-4261.
- 291 **Blank, J. M., Morrissette, J. M., Landeira-Fernandez, A. M., Blackwell, S. B., Williams, T. D.**  
292 **and Block, B. A.** (2004). *In situ* cardiac performance of Pacific bluefin tuna hearts in response  
293 to acute temperature change. *J. Exp. Biol.* **207**, 881-890.
- 294 **Block, B. A., Dewar, H., Blackwell, S. B., Williams, T. D., Prince, E. D., Farwell, C. J., Boustany,**  
295 **A., Teo, S. L. H., Seitz, A., Walli, A. et al.** (2001). Migratory movements, depth preferences,  
296 and thermal biology of Atlantic bluefin tuna. *Science* **293**, 1310-1314.
- 297 **Block, B. A. and Finnerty, J. R.** (1994). Endothermy in fishes - a phylogenetic analysis of constraints,  
298 predispositions, and selection pressures. *Env. Biol. Fishes* **40**, 283-302.
- 299 **Block, B. A., Teo, S. L. H., Walli, A., Boustany, A., Stokesbury, M. J. W., Farwell, C. J., Weng, K.**  
300 **C., Dewar, H. and Williams, T. D.** (2005). Electronic tagging and population structure of  
301 Atlantic bluefin tuna. *Nature* **434**, 1121-1127.
- 302 **Boustany, A. M., Matteson, R., Castleton, M., Farwell, C. and Block, B. A.** (2010). Movements of  
303 Pacific bluefin tuna (*Thunnus orientalis*) in the Eastern North Pacific revealed with archival  
304 tags. *Prog. Oceanogr.* **86**, 94-104.
- 305 **Brill, R. W., Block, B. A., Boggs, C. H., Bigelow, K. A., Freund, E. V. and Marcinek, D. J.** (1999).  
306 Horizontal movements and depth distribution of large adult yellowfin tuna (*Thunnus albacares*)  
307 near the Hawaiian Islands, recorded using ultrasonic telemetry: implications for the  
308 physiological ecology of pelagic fishes. *Mar. Biol.* **133**, 395-408.
- 309 **Brill, R. W. and Bushnell, P. G.** (1991). Metabolic and cardiac scope of high energy demand teleosts,  
310 the tunas. *Can. J. Zool.* **69**, 2002-2009.
- 311 **Brill, R. W. and Bushnell, P. G.** (2001). The cardiovascular system of tunas. In *Tuna: Physiology,*  
312 *Ecology, and Evolution*, vol. 19 Fish Physiology eds. B. A. Block and E. D. Stevens), pp. 79-  
313 120. San Diego: Academic Press.
- 314 **Bushnell, P. G. and Brill, R. W.** (1992). Oxygen transport and cardiovascular responses in skipjack  
315 tuna (*Katsuwonus pelamis*) and yellowfin tuna (*Thunnus albacares*) exposed to acute hypoxia.  
316 *J. Comp. Physiol. B* **162**, 131-43.
- 317 **Carey, F. G., Kanwisher, J. W. and Stevens, E. D.** (1984). Bluefin tuna warm their viscera during  
318 digestion. *J. Exp. Biol.* **109**, 1-20.
- 319 **Carey, F. G. and Teal, J. M.** (1969). Regulation of body temperature by the bluefin tuna. *Comp.*  
320 *Biochem. Physiol. A* **28**, 205-213.
- 321 **Clark, T. D., Brandt, W. T., Nogueira, J., Rodriguez, L. E., Price, M., Farwell, C. J. and Block, B.**  
322 **A.** (2010). Postprandial metabolism of Pacific bluefin tuna (*Thunnus orientalis*). *J. Exp. Biol.*  
323 **213**, 2379-2385.
- 324 **Clark, T. D. and Seymour, R. S.** (2006). Cardiorespiratory physiology and swimming energetics of a  
325 high-energy-demand teleost, the yellowtail kingfish (*Seriola lalandi*). *J. Exp. Biol.* **209**, 3940-  
326 3951.
- 327 **Clark, T. D., Seymour, R. S., Wells, R. M. G. and Frappell, P. B.** (2008a). Thermal effects on the  
328 blood respiratory properties of southern bluefin tuna, *Thunnus maccoyii*. *Comp. Biochem.*  
329 *Physiol. A* **150**, 239-246.

- 330 **Clark, T. D., Taylor, B. D., Seymour, R. S., Ellis, D., Buchanan, J., Fitzgibbon, Q. P. and**  
331 **Frappell, P. B.** (2008b). Moving with the beat: heart rate and visceral temperature of free-  
332 swimming and feeding bluefin tuna. *Proc. Roy. Soc. B: Biol. Sci.* **275**, 2841-2850.
- 333 **Dagorn, L., Holland, K., N., Hallier, J.-P., Taquet, M., Moreno, G., Sancho, G., Itano, D., G.,**  
334 **Aumeeruddy, R., Girard, C., Million, J. et al.** (2006). Deep diving behavior observed in  
335 yellowfin tuna (*Thunnus albacares*). *Aquat. Living Resour.* **19**, 85-88.
- 336 **Dickson, K. A. and Graham, J. B.** (2004). Evolution and consequences of endothermy in fishes.  
337 *Physiol. Biochem. Zool.* **77**, 998-1018.
- 338 **Dizon, A. E., Neill, W. H. and Magnuson, J. J.** (1977). Rapid temperature compensation of volitional  
339 swimming speeds and lethal temperatures in tropical tunas (Scombridae). *Env. Biol. Fishes* **2**,  
340 83.
- 341 **Dizon, A. E., Stevens, E. D., Neill, W. H. and Magnuson, J. J.** (1974). Sensitivity of restrained  
342 skipjack tuna (*Katsuwonus pelamis*) to abrupt increases in temperature. *Comp. Biochem.*  
343 *Physiol. A* **49**, 291-299.
- 344 **Fudge, D. S. and Stevens, E. D.** (1996). The visceral retia mirabilia of tuna and sharks: an annotated  
345 translation and discussion of the Eschricht & Müller 1835 paper and related papers. *Guelph*  
346 *Ichthyology Reviews* **4**, 1-53.
- 347 **Galli, G. L. J., Lipnick, M. S. and Block, B. A.** (2009). Effect of thermal acclimation on action  
348 potentials and sarcolemmal K<sup>+</sup> channels from Pacific bluefin tuna cardiomyocytes. *Am. J.*  
349 *Physiol. - Reg. I.* **297**, R502-509.
- 350 **Galli, G. L. J., Lipnick, M. S., Shiels, H. A. and Block, B. A.** (2011). Temperature effects on Ca<sup>2+</sup>  
351 cycling in scombrid cardiomyocytes: a phylogenetic comparison. *J. Exp. Biol.* **214**, 1068-1076.
- 352 **Gordon, M. S.** (1968). Oxygen consumption of red and white muscles from tuna fishes. *Science* **159**,  
353 87-90.
- 354 **Graham, J. B. and Dickson, K. A.** (2004). Tuna comparative physiology. *J. Exp. Biol.* **207**, 4015-  
355 4024.
- 356 **Gunn, J., Hartog, J. and Rough, K.** (2001). The relationship between food intake and visceral  
357 warming in southern bluefin tuna (*Thunnus maccoyii*). In *Electronic Tagging and Tracking in*  
358 *Marine Fisheries*, vol. 1 eds. J. R. Sibert and J. L. Nielsen), pp. 1009-1130: Dordrecht: Kluwer  
359 Academic Publishers.
- 360 **Holland, K. N., Brill, R. W. and Change, R. K. C.** (1990). Horizontal and vertical movements of  
361 yellowfin and bigeye tuna associated with fish aggregating devices. *Fish. Bull.* **88**, 493-507.
- 362 **Keen, J. E., Aota, S., Brill, R. W., Farrell, A. P. and Randall, D. J.** (1995). Cholinergic and  
363 adrenergic regulation of heart rate and ventral aortic pressure in two species of tropical tunas,  
364 *Katsuwonus pelamis* and *Thunnus albacares*. *Can J Zool* **73**, 1681-1688.
- 365 **Kitagawa, T., Kimura, S., Nakata, H. and Yamada, H.** (2007). Why do young Pacific bluefin tuna  
366 repeatedly dive to depths through the thermocline? *Fisheries Sci.* **73**, 98-106.
- 367 **Korsmeyer, K. E., Lai, N. C., Shadwick, R. E. and Graham, J. B.** (1997a). Heart rate and stroke  
368 volume contributions to cardiac output in swimming yellowfin tuna - response to exercise and  
369 temperature. *J. Exp. Biol.* **200**, 1975-1986.
- 370 **Korsmeyer, K. E., Lai, N. C., Shadwick, R. E. and Graham, J. B.** (1997b). Oxygen transport and  
371 cardiovascular responses to exercise in the yellowfin tuna *Thunnus albacares*. *J. Exp. Biol.* **200**,  
372 1987-1997.
- 373 **Landeira-Fernandez, A. M., Castilho, P. C. and Block, B. A.** (2012). Thermal dependence of  
374 cardiac SR Ca<sup>2+</sup>-ATPase from fish and mammals. *J. Therm. Biol.* **37**, 217-223.

- 375 **Lawson, G. L., Castleton, M. R. and Block, B. A.** (2010). Movements and diving behavior of  
376 Atlantic bluefin tuna *Thunnus thynnus* in relation to water column structure in the northwestern  
377 Atlantic. *Mar. Ecol. Prog. Ser.* **400**, 245-265.
- 378 **Malte, H., Larsen, C., Musyl, M. and Brill, R.** (2007). Differential heating and cooling rates in  
379 bigeye tuna (*Thunnus obesus* Lowe): a model of non-steady state heat exchange. *J. Exp. Biol.*  
380 **210**, 2618-2626.
- 381 **Marcinek, D. J., Blackwell, S. B., Dewar, H., Freund, E. V., Farwell, C., Dau, D., Seitz, A. C. and**  
382 **Block, B. A.** (2001). Depth and muscle temperature of Pacific bluefin tuna examined with  
383 acoustic and pop-up satellite archival tags. *Mar. Biol.* **138**, 869-885.
- 384 **Patterson, T. A., Evans, K., Carter, T. I. and Gunn, J. S.** (2008). Movement and behaviour of large  
385 southern bluefin tuna (*Thunnus maccoyii*) in the Australian region determined using pop-up  
386 satellite archival tags. *Fish. Oceanogr.* **17**, 352-367.
- 387 **Rossi-Fanelli, A., Antonini, E. and Giuffre, R.** (1960). Oxygen equilibrium of myoglobin from  
388 *Thunnus thynnus*. *Nature* **186**, 896.
- 389 **Schaefer, K. M., Fuller, D. W. and Block, B. A.** (2011). Movements, behavior, and habitat utilization  
390 of yellowfin tuna (*Thunnus albacares*) in the Pacific Ocean off Baja California, Mexico,  
391 determined from archival tag data analyses, including unscented Kalman filtering. *Fisheries*  
392 *Res.* **112**, 22-37.
- 393 **Walli, A., Teo, S. L. H., Boustany, A., Farwell, C. J., Williams, T., Dewar, H., Prince, E. and**  
394 **Block, B. A.** (2009). Seasonal movements, aggregations and diving behavior of Atlantic bluefin  
395 tuna (*Thunnus thynnus*) revealed with archival tags. *PLoS ONE* **4**, e6151.
- 396 **Walli, A. G.** (2007). On the movements, aggregations and the foraging habitat of bluefin tuna  
397 (*Thunnus thynnus* & *orientalis*). Santa Cruz, California: Ph.D. dissertation, University of  
398 California Santa Cruz.

399  
400  
401  
402  
403  
404  
405  
406  
407  
408  
409  
410

## FIGURE LEGENDS



411 **Fig. 1:** Visceral temperature ( $T_V$ ) and heart rate ( $f_H$ ) of two captive Pacific bluefin tunas (*Thunnus*  
412 *orientalis*) in a large holding tank swimming with seven conspecifics when faced with a series of  
413 ambient water temperature ( $T_a$ ) challenges over approximately seven days (Tuna 1 body mass 9.7 kg,  
414 straight fork length 77 cm; Tuna 2 = 13.3 kg, 80 cm). From left to right, the temperature challenges  
415 were (1) rapid while the tunas were in a fasted state, (2) slow while the tunas were in a fasted state, and  
416 (3) rapid while the tunas were digesting a satiation meal of sardines. Also included on the right side of  
417 the figure is a two-day period where Tuna 2 was transferred to another tank at 22.5°C and subsequently  
418 further warmed to 23.7°C. Asterisks indicate feeding periods. Meal sizes were 1.1 kg and 1.2 kg for  
419 Tuna 1 and Tuna 2, respectively, at 20°C, and 1.0 kg for Tuna 2 at 23.7°C. The data used to generate  
420 Figs. S1 and S2 are indicated.

421  
422 **Fig. 2:** Rate of oxygen consumption ( $\dot{M}_{O_2}$ ; B-C), heart rate ( $f_H$ ; D-E), oxygen pulse (F-G), and tail  
423 beat-frequency (TBF; H-I) of a Pacific bluefin tuna (*Thunnus orientalis*; Tuna 1) in a swim  
424 respirometer as a function of ambient water temperature ( $T_a$ ) and visceral temperature ( $T_V$ ) when  
425 undergoing the temperature challenges illustrated in Panel A (body mass = 9.7 kg, straight fork length  
426 = 77 cm;  $P < 0.001$  for all regressions). Closed circles are periods of decreasing  $T_a$ , open circles are  
427 periods of increasing  $T_a$  (as in (A)). Water speed remained at 1 fork length  $s^{-1}$ . Regressions lines are  
428 described by (B)  $y = 867.02x^{-0.53}$ ,  $r^2 = 0.60$ ; (C)  $y = 1429.50x^{-0.68}$ ,  $r^2 = 0.62$ ; (D)  $y = 34.54 + 0.050e^{0.32x}$ ,  
429  $r^2 = 0.86$ ; (E)  $y = 37.83 + 0.007e^{0.37x}$ ,  $r^2 = 0.71$ ; (F)  $y = -0.007x + 0.20$ ,  $r^2 = 0.84$ ; (G)  $y = -0.007x + 0.20$ ,  
430  $r^2 = 0.56$ ; (H)  $y = -3.17x + 162.15$ ,  $r^2 = 0.59$ ; (I)  $y = -3.44x + 173.81$ ,  $r^2 = 0.62$ . Also shown in (D) and (H)  
431 are the heart rates and tail beat-frequencies, respectively, of this fish (Tuna 1; squares) and another fish  
432 (Tuna 2; triangles) when exposed to a slow change in  $T_a$  in a holding tank (data binned into  $T_a$  groups  
433 of 15-15.9°C, 16-16.9°C...19-19.9°C; values are means  $\pm$  S.E.M.). Dotted line in (D) represents the  
434 standard heart rates of *T. orientalis* hearts in an *in situ* preparation from Blank et al. (2004).





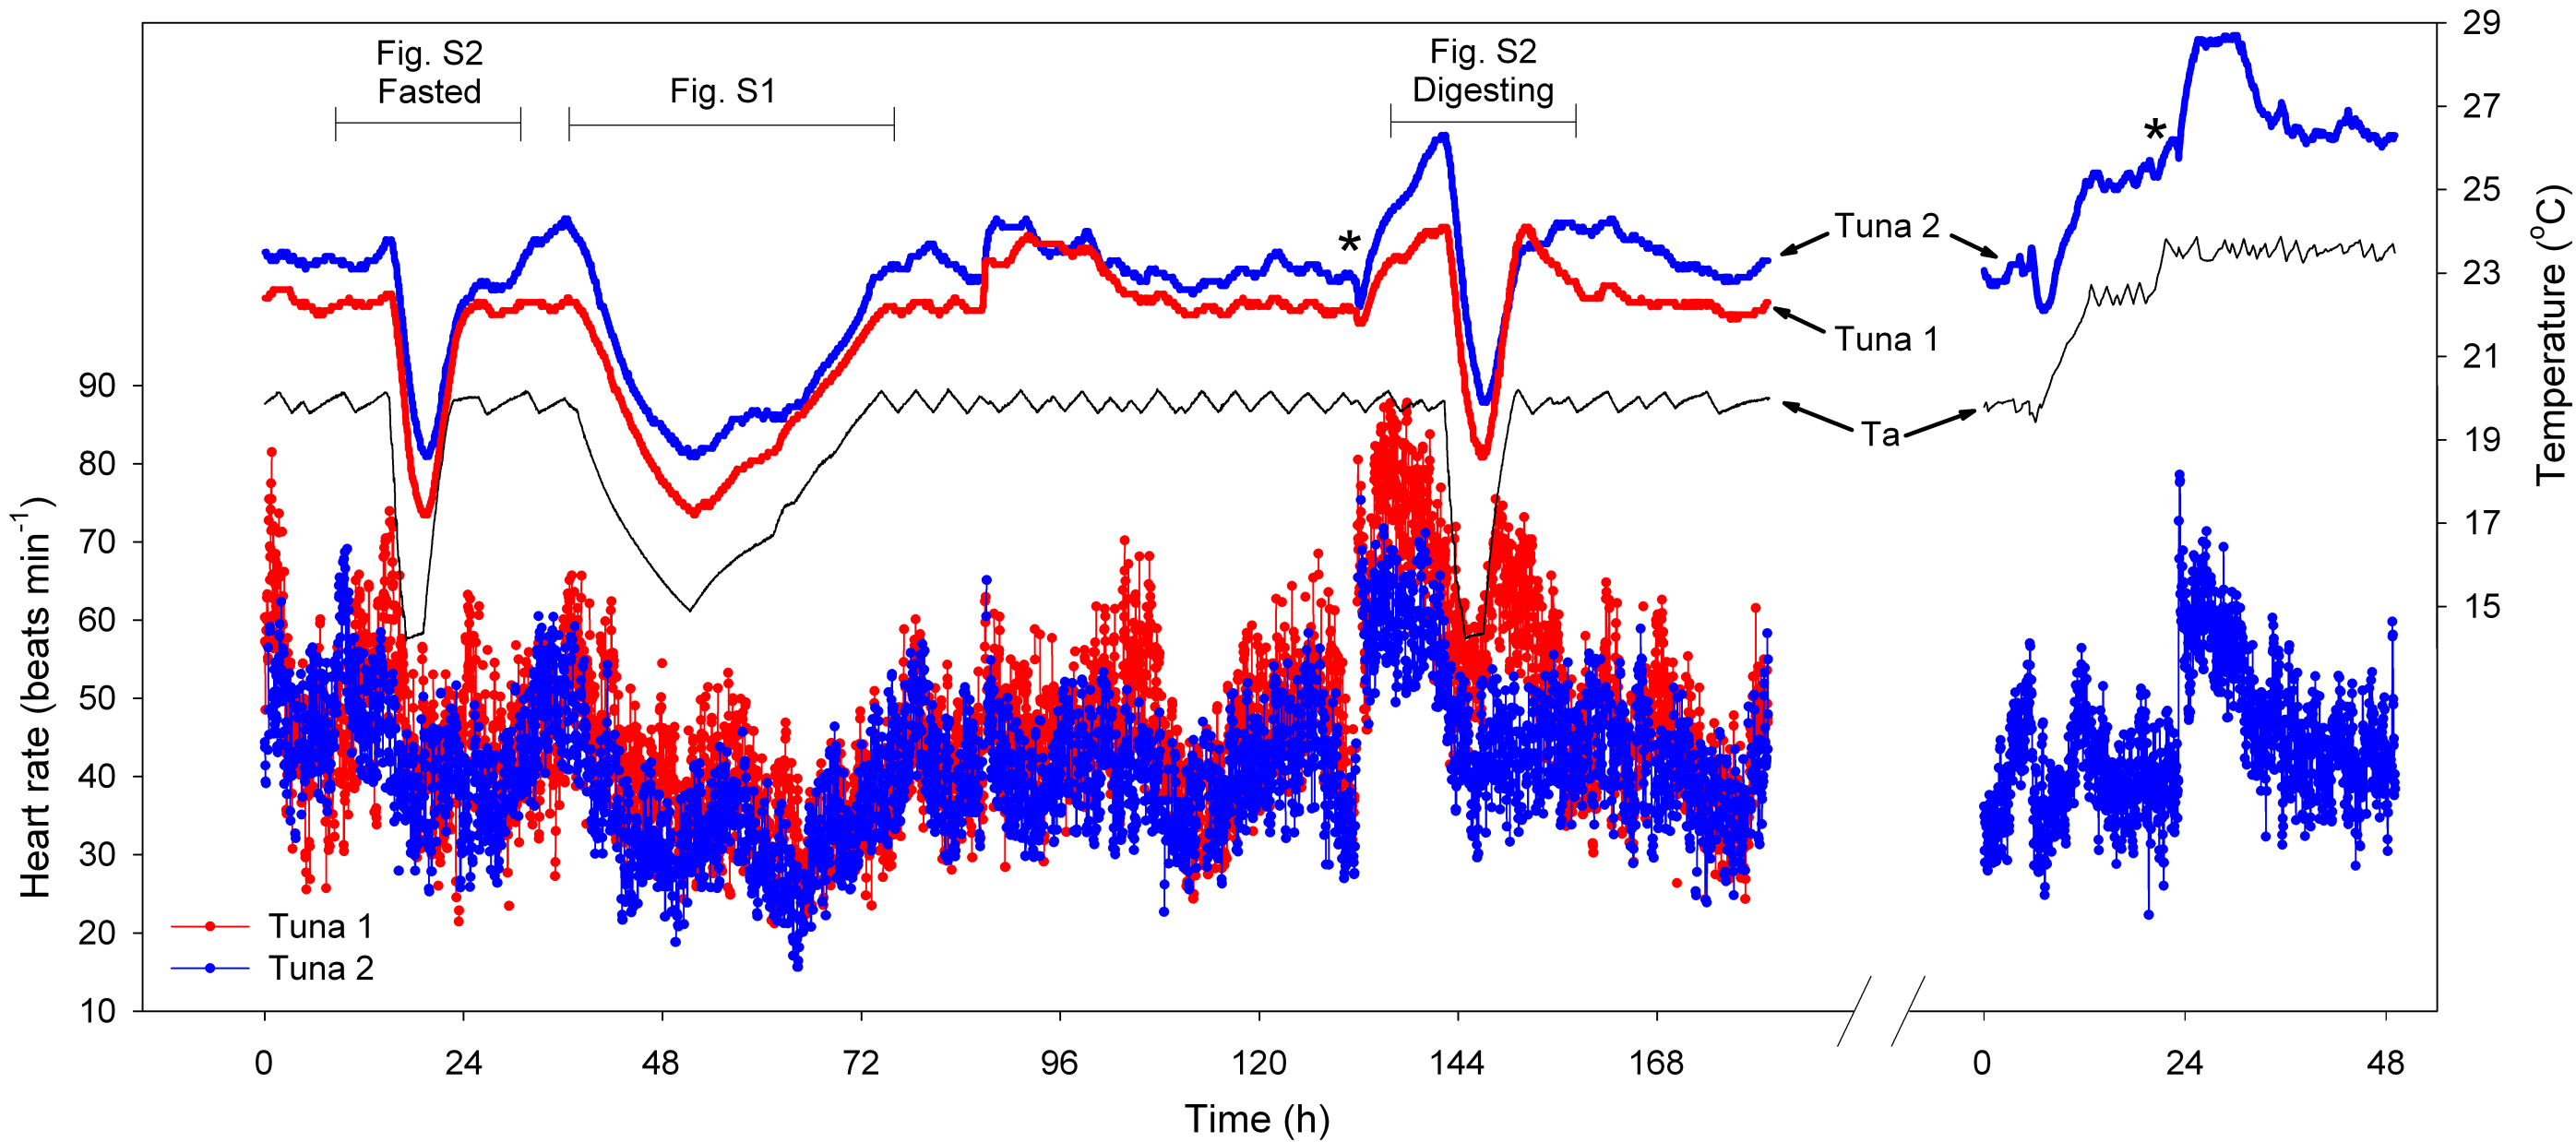

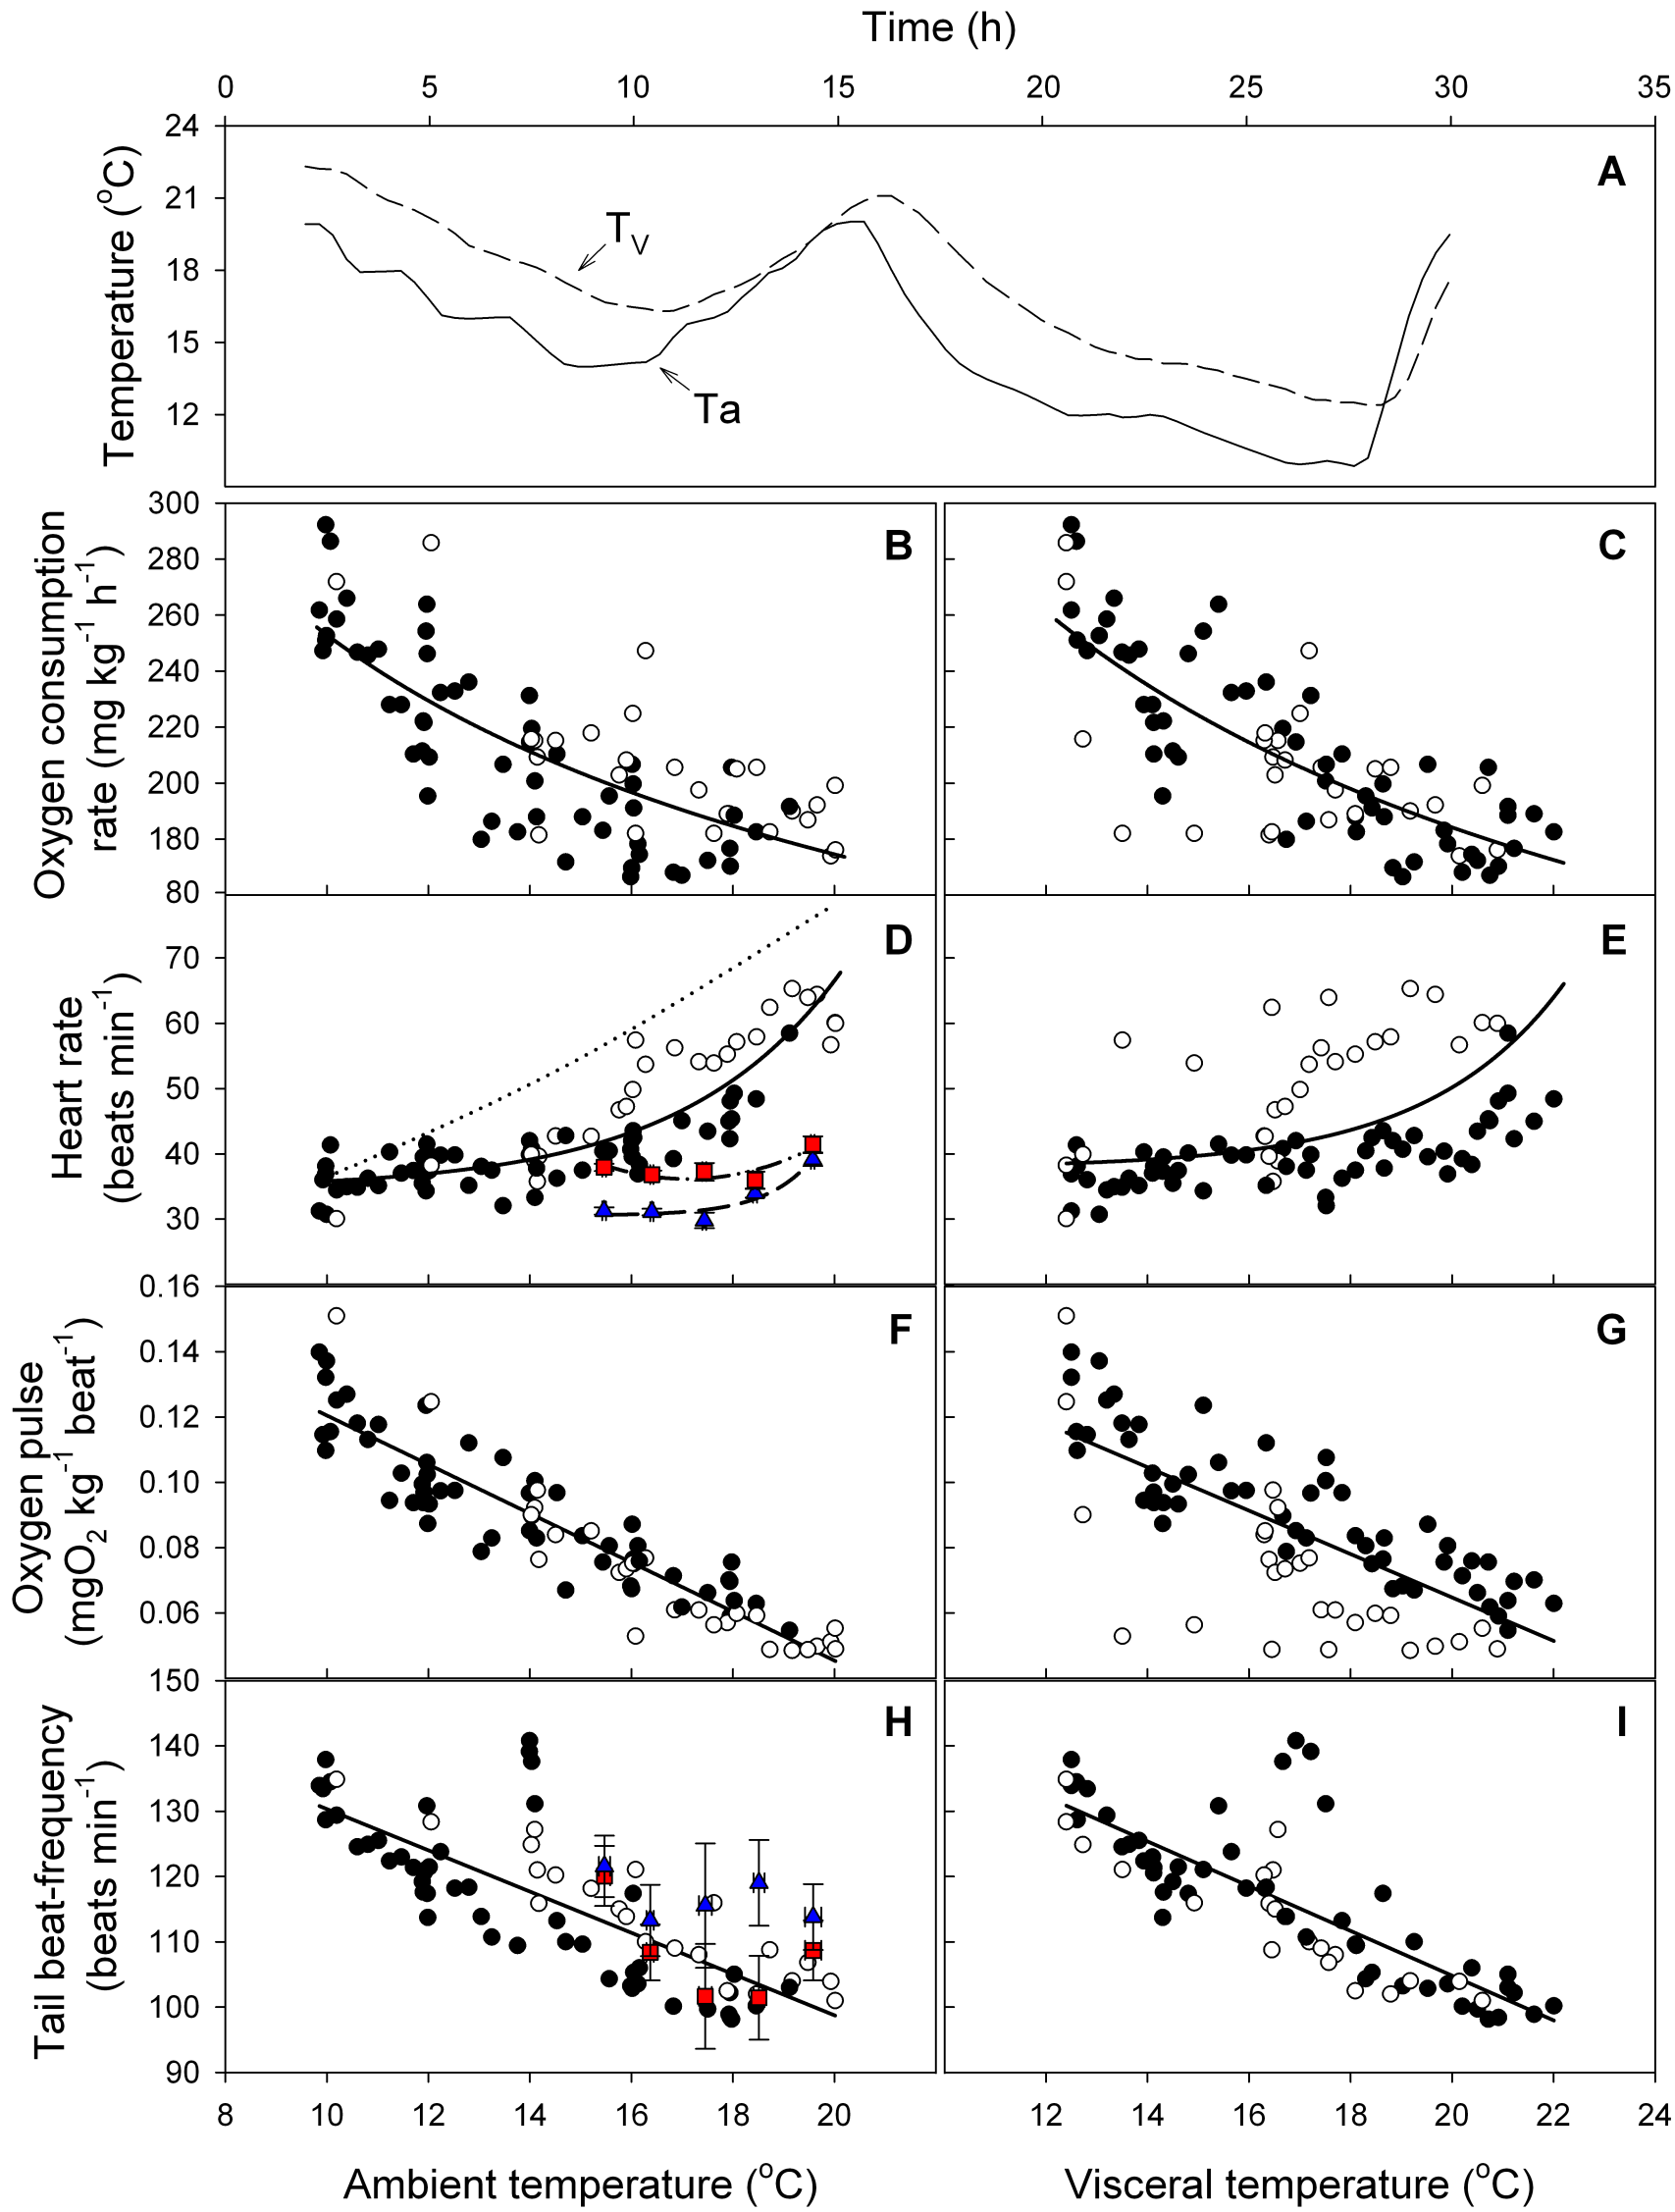

Source: https://cob.silverchair.com/jeb/article-pdf/doi/10.1242/jeb.086546/2036896/jeb_086546.pdf
